# Supplementary material for: Gut dysbiosis in oncology: a risk factor for immunoresistance
Source: Cell Res. 2026 Jan 14;36(2):103–20. doi: 10.1038/s41422-025-01212-6 (PMC12847903; doi:10.1038/s41422-025-01212-6)
Supplement: Supplementary file 2 — Supplementary information, Fig. S2 [file 41422_2025_1212_MOESM2_ESM.pdf]

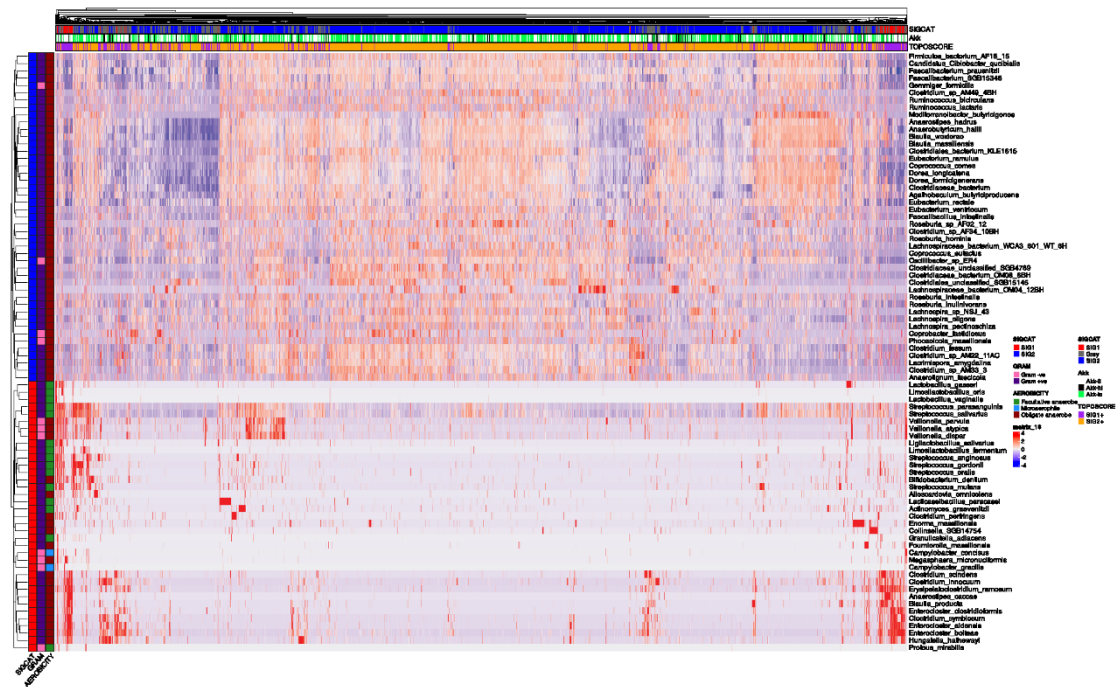

**Supplementary information, Fig. S2 Landscape of SIG1 and SIG2 bacterial abundances across 5,346 healthy volunteer microbiomes.** Same as Supplementary information, Fig. S1 but for 5,346 healthy volunteers. Like with the cancer cohort, two notable dysbiosis types can be observed in a minority of subjects. Type I dysbiosis is marked as an increase in abundance of oral taxa, while Type II presents as an overabundance of *Enterocloster* and *Clostridium* spp. at the expense of SIG2 bacteria. These data illustrate that the dysbiotic patterns prominent in cancer patients also exist in healthy participants, underscoring the utility of the SIG1/SIG2 framework for discriminating between eubiotic and dysbiotic microbiomes across disease states. Akk, *A. muciniphila*; SIGCAT, SIG category; TOPOSCORE, Topological score.
